# Supplementary material for: Responses of Natural Microorganisms to Land Reclamation and Applications of Functional Microorganisms in Biorestoration of Coal Mining Area
Source: MDPI journal article supplement (doi:10.3390/d16020086), 2024-01-28
Supplement: s1 [file s1]

**Table S1 Responses of microorganisms to land reclamation**

| Study area                            | Methods of reclamation                                                                                                            | Biodiversity changes                                                                                                      | Microbial community structure changes                                                                                                                       | Main driven factors                                                                                                                                     | Reference |
|---------------------------------------|-----------------------------------------------------------------------------------------------------------------------------------|---------------------------------------------------------------------------------------------------------------------------|-------------------------------------------------------------------------------------------------------------------------------------------------------------|---------------------------------------------------------------------------------------------------------------------------------------------------------|-----------|
| Disturbed sites after opencast mining | Liming and fertilization                                                                                                          | Soil from the reconstructed sites showed a significantly lower microbial diversity compared to undisturbed soils          | The composition of the microbial community is significantly different from the undisturbed sites                                                            | Not given                                                                                                                                               | [8]       |
| Opencast mine                         | Revegetation                                                                                                                      | The soil microbial $\alpha$ -diversity index of unreclaimed land being lower than that of vegetation restoration.         | The structure of the soil bacterial community did not change significantly, even though the region has undergone nearly 20 years of vegetation restoration. | The bacterial community structure had no significant response to changes in soil biochemical properties, despite 18–20 years of vegetation restoration. | [25]      |
| Coal mine spoils                      | Backfilling, topsoil handling, application of organic amendments, planting a grass-legume mixture and mulching with crop residues | Bacterial diversity first declined, then increased, and finally approached the predisturbance levels.                     | Long-term reclamation strongly affected microbial community structure and diversity.                                                                        | Soil characteristics and vegetation                                                                                                                     | [29]      |
| Underground mining area               | Gangue filling, topsoil cover, vegetation                                                                                         | The diversity and abundance of bacterial communities in reclaimed soils is slightly different from that of natural soils. | After a 15-year reclamation period, the soil bacterial community structure was found to have a high similarity with natural soil.                           | Not given                                                                                                                                               | [30]      |
| Coal mine spoil                       | Agronomic treatments and revegetation                                                                                             | Agronomic treatments increased                                                                                            | Agronomic treatments had a positive                                                                                                                         | Not given                                                                                                                                               | [32]      |

|                           |                                                   |  |                                                                                                                                                                                                |                                                                                                                                   |                                                                                                                                                                                               |
|---------------------------|---------------------------------------------------|--|------------------------------------------------------------------------------------------------------------------------------------------------------------------------------------------------|-----------------------------------------------------------------------------------------------------------------------------------|-----------------------------------------------------------------------------------------------------------------------------------------------------------------------------------------------|
|                           |                                                   |  | functional diversity of soil microbial communities                                                                                                                                             | effect on bacterial community structure                                                                                           |                                                                                                                                                                                               |
| Opencast coal mining area | Vegetation                                        |  | Fungal diversity indices significantly changed in response to reclamation vegetation and time, but bacterial and archaeal indices were only slightly influenced by reclamation characteristics | The composition of the microbial community changed in succession.                                                                 | As major drivers of microbial community diversity and structure, reclamation scenarios, times, and vegetation type have different effects on bacterial, archaeal, and fungal succession. [33] |
| Opencast coal mining area | Vegetation and supplementary inorganic fertilizer |  | Bacterial richness and evenness were significantly greater than in nonmined soils.                                                                                                             | The bacterial communities on rehabilitated sites became progressively more similar to those of nonmined analogue sites over time. | Bacterial species composition was associated significantly with the plant density and total stem cross-sectional area of woody vegetation. [34]                                               |
| Open-cut coal mine        | Vegetation                                        |  | The richness but not evenness of fungal communities was significantly greater in rehabilitated than in nonmined soils and increased over time.                                                 | Soil fungal community structure would more closely resemble their pre-disturbance states over time.                               | Fungal community composition was significantly influenced by aboveground vegetation, edaphic variables, and the length of rehabilitation. [42]                                                |
| Coal mine sites           | Fertilizer amendment                              |  | Bacterial diversity increased with reclamation duration.                                                                                                                                       | The longer the reclamation duration, the greater the similarity of bacterial                                                      | Reclamation duration played a greater role than [44]                                                                                                                                          |

|                                                 |                                                                                                                                                              |                                                                                                     |                                                                                                                      |                                                                                                                                                                      |      |
|-------------------------------------------------|--------------------------------------------------------------------------------------------------------------------------------------------------------------|-----------------------------------------------------------------------------------------------------|----------------------------------------------------------------------------------------------------------------------|----------------------------------------------------------------------------------------------------------------------------------------------------------------------|------|
|                                                 |                                                                                                                                                              |                                                                                                     | community structure to the undisturbed site.                                                                         | fertilizer in bacterial community structure.                                                                                                                         |      |
| An active surface lignite mining operation area | Replacement of overburden and returning of the leased land to the owner in an agriculturally viable manner, typically consisting of pasture or wooded cover. | Reclaimed soil surpasses reference soil in diversity and richness.                                  | Bacterial community structure most likely will not return to its origin.                                             | The primary driver of bacterial community dynamics was vegetative cover, although time also influenced dynamics.                                                     | [45] |
| The abandoned land of former mining waste       | Afforestation                                                                                                                                                | Afforestation could increase both fungal and bacterial biomass.                                     | Microbial community structure was altered by different tree species and land use.                                    | Tree species and soil chemical properties made the soil microbial community composition different.                                                                   | [46] |
| Coal-mining subsidence land                     | Organic amendments and vegetation mixed sowing                                                                                                               | The reclaimed soil had a higher community diversity of bacteria than subsided soil                  | There was a significant difference in soil bacterial community structure between the reclaimed and subsided land.    | Reclamation practices have a great influence on soil microbial communities, through the effects of soil attributes.                                                  | [47] |
| Coal-mining subsidence area                     | Fertilizer amendment                                                                                                                                         | Fertilization (organic and chemical fertilizers) and reclamation time improved bacterial diversity. | Soil bacterial community structure in the 7-year reclaimed soils was more similar to those in the undisturbed soils. | Reclamation time is the main driving force for the restoration of soil bacterial communities, and fertilization can shorten the recovery time of the reclaimed soil. | [48] |
| Opencast Coal Mine dumpsites                    | Vegetation without irrigation,                                                                                                                               | Revegetation engineering could increase                                                             | Bacterial community composition                                                                                      | Soil microbes are influenced by soil factors                                                                                                                         | [49] |

|                                              |              |                                                 |                                                                                                                   |                                                                                                                                   |                                                                                                   |      |
|----------------------------------------------|--------------|-------------------------------------------------|-------------------------------------------------------------------------------------------------------------------|-----------------------------------------------------------------------------------------------------------------------------------|---------------------------------------------------------------------------------------------------|------|
|                                              |              | fertilization, nor perturbation after planting. | soil microbial diversity.                                                                                         | was significantly different between re-vegetated and non-vegetated soils and among soils re-vegetated by different plant species. | and aboveground plant species.                                                                    |      |
| surface coal mine site                       | Vegetation   |                                                 | The higher soil microbial abundance and diversity were from mixed forests compared with that of the control site. | Soil bacterial, archaeal, and fungal T-RFLP profiles differed with reclaimed scenarios.                                           | Reclaimed scenarios were found to determine soil microbial abundance, diversity, and composition. | [50] |
| Spoil heap in the brown-coal mining district | Revegetation |                                                 | Not given.                                                                                                        | The composition of microbial communities differed among trees and also exhibited seasonal differences                             | Dominant tree types affect the soil microbial communities.                                        | [58] |

---
